# Supplementary material for: Mutagenicity in a Molecule: Identification of Core Structural Features of Mutagenicity Using a Scaffold Analysis
Source: PubMed Central journal article supplement (PMC4749256; doi:10.1371/journal.pone.0148900), 2016-02-10
Supplement: pone.0148900.s001.pdf [file pone.0148900.s001.pdf]

**Table A.** The numbers of scaffolds selected, mutagens categorized as the selected scaffold and the ratios of  $C_1$  to S for different mutagenicity cutoffs. ( **$C_1$ : number of mutagenic compounds, S: number of mutagenic scaffolds**)

| Mutagenicity Cutoff | Scaffolds Selected (S) | Mutagens Categorized as Selected Scaffold ( $C_1$ ) | $C_1/S$        |
|---------------------|------------------------|-----------------------------------------------------|----------------|
| 1                   | 5                      | 96                                                  | 19.2 (96/5)    |
| 0.95                | 6                      | 118                                                 | 19.7 (118/6)   |
| 0.9                 | 14                     | 310                                                 | 22.1 (310/14)  |
| 0.85                | 26                     | 590                                                 | 22.7 (590/26)  |
| 0.8                 | 30                     | 681                                                 | 22.7 (681/30)  |
| 0.75                | 34                     | 753                                                 | 22.1 (753/34)  |
| 0.7                 | 37                     | 860                                                 | 23.2 (860/37)  |
| 0.65                | 43                     | 1016                                                | 23.6 (1016/43) |
| 0.6                 | 45                     | 1075                                                | 23.9 (1075/45) |
| 0.55                | 46                     | 1082                                                | 23.5 (1082/46) |

**Table B.** The numbers of scaffolds selected, non-mutagens categorized as the selected scaffold and ratios of C<sub>2</sub> to S for different mutagenicity cutoffs. (**C<sub>2</sub>: number of non-mutagenic compounds, S: number of non-mutagenic scaffolds**)

| Mutagenicity | Scaffolds Selected (S) | Non-Mutagens Categorized as Selected Scaffold (C <sub>2</sub> ) | C <sub>2</sub> /S |
|--------------|------------------------|-----------------------------------------------------------------|-------------------|
| 0.45         | 21                     | 924                                                             | 44 (924/21)       |
| 0.4          | 14                     | 229                                                             | 16.4 (229/14)     |
| 0.35         | 12                     | 202                                                             | 16.8 (202/12)     |
| 0.3          | 10                     | 151                                                             | 15.1 (151/10)     |
| 0.25         | 8                      | 104                                                             | 13 (104/8)        |
| 0.2          | 6                      | 80                                                              | 13.3 (80/6)       |
| 0.15         | 6                      | 80                                                              | 13.3 (80/6)       |
| 0.1          | 2                      | 22                                                              | 11 (22/2)         |
| 0.05         | 2                      | 22                                                              | 11 (22/2)         |
| 0            | 2                      | 22                                                              | 11 (22/2)         |

**Table C.** Rate of mutagen and number of compounds for each scaffold in: major mutagenic scaffold groups (Acridine, Phenanthrene, Pyrene, Quinoxaline), minor mutagenic scaffold group (Naphthalene), and scaffold groups which cannot be classified as either major or minor mutagenic groups (Benzene, Quinoline).

| <b>Scaffold Name</b>                          | <b>Rate of Mutagen</b> | <b>Compound Number</b> |
|-----------------------------------------------|------------------------|------------------------|
| <b>Acridine Group</b>                         |                        |                        |
| Acridine                                      | 94%                    | 53                     |
| Benzo[c]acridine                              | 86%                    | 21                     |
| N-Phenylacridin-9-amine                       | 94%                    | 18                     |
| <b>Phenanthrene Group</b>                     |                        |                        |
| Phenanthrene                                  | 93%                    | 40                     |
| 15,16-Dihydrocyclopenta[a]-phenanthren-17-one | 77%                    | 13                     |
| Chrysene                                      | 96%                    | 23                     |
| <b>Pyrene Group</b>                           |                        |                        |
| Pyrene                                        | 100%                   | 39                     |
| Benzo[e]pyrene                                | 90%                    | 10                     |
| Benzo[a]pyrene                                | 84%                    | 50                     |
| 9,10-Dihydrobenzo[a]pyrene                    | 90%                    | 10                     |
| <b>Quinoxaline Group</b>                      |                        |                        |
| Quinoxaline                                   | 78%                    | 18                     |
| 1H-imidazo[4,5-g]quinoxaline                  | 86%                    | 22                     |
| Phenazine                                     | 92%                    | 25                     |
| <b>Naphthalene Group</b>                      |                        |                        |
| Naphthalene                                   | 62%                    | 81                     |
| Anthracene                                    | 87%                    | 31                     |

---

|                        |     |      |
|------------------------|-----|------|
| Phenanthrene           | 93% | 40   |
| <b>Benzene Group</b>   |     |      |
| Benzene                | 42% | 1071 |
| Phenoxybenzene         | 85% | 34   |
| Diphenyldiazene        | 72% | 81   |
| Chalcone               | 24% | 17   |
| (E)-stilbene           | 82% | 34   |
| <hr/>                  |     |      |
| <b>Quinoline Group</b> |     |      |
| Quinoline              | 54% | 90   |
| Acridine               | 94% | 53   |
| N-Phenylsulfamate      | 0%  | 11   |

---

**Table D.** Overview of the selected scaffolds.

| Scaffold                                                                            | Name                       | Positive Compounds<br>/All Compounds | Ames Positive<br>Rate |
|-------------------------------------------------------------------------------------|----------------------------|--------------------------------------|-----------------------|
| <b>Mutagenic Scaffolds</b>                                                          |                            |                                      |                       |
| 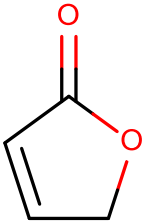   | 2(5H)-Furanone             | 23/25                                | 0.92                  |
|   | Aranciamycinone            | 14/14                                | 1                     |
|  | Piperidine                 | 11/12                                | 0.92                  |
|  | Phenoxybenzene             | 29/34                                | 0.85                  |
|  | 3H-imidazo[4,5-f]quinoline | 13/14                                | 0.93                  |

| Scaffold                                                                            | Name                         | Positive Compounds<br>/All Compounds | Ames Positive<br>Rate |
|-------------------------------------------------------------------------------------|------------------------------|--------------------------------------|-----------------------|
| 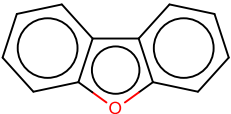   | Dibenzofuran                 | 9/12                                 | 0.75                  |
|    | 9H-carbazole                 | 30/33                                | 0.91                  |
|    | Anthracene                   | 27/31                                | 0.87                  |
|   | 1H-imidazo[4,5-f]quinoxaline | 19/22                                | 0.86                  |
|  | Anthracene-9,10-dione        | 59/69                                | 0.86                  |
|  | Acridine                     | 50/53                                | 0.94                  |
|  | Benzo[c]acridine             | 18/21                                | 0.86                  |

| Scaffold                                                                            | Name                                         | Positive Compounds<br>/All Compounds | Ames Positive<br>Rate |
|-------------------------------------------------------------------------------------|----------------------------------------------|--------------------------------------|-----------------------|
| 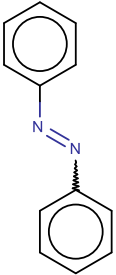   | Diphenyldiazene                              | 58/81                                | 0.72                  |
|    | Benzo[e]pyrene                               | 9/10                                 | 0.9                   |
|  | N-phenylacridin-9-amine                      | 17/18                                | 0.94                  |
|  | 15,16-dihydrocyclopenta[a]phenanthren-17-one | 10/13                                | 0.77                  |
|  | Benzo[a]pyrene                               | 42/50                                | 0.84                  |
|  | N-phenylthiophene-3-carboxamide              | 23/23                                | 1                     |

| Scaffold                                                                            | Name                                                | Positive Compounds<br>/All Compounds | Ames Positive<br>Rate |
|-------------------------------------------------------------------------------------|-----------------------------------------------------|--------------------------------------|-----------------------|
| 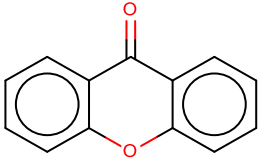   | Xanthen-9-one                                       | 9/10                                 | 0.9                   |
|    | 1-benzyl-1a,9b-dihydrophenanthro[<br>9,10-b]azirine | 10/10                                | 1                     |
|   | 7H- dibenzo(C,G)carbazole                           | 11/12                                | 0.92                  |
|  | Phenanthrene                                        | 37/40                                | 0.93                  |
|  | Fluoranthene                                        | 33/38                                | 0.87                  |
|  | 9,10-dihydro-benzo[a]pyrene                         | 9/10                                 | 0.9                   |



| Scaffold                                                                            | Name                                  | Positive Compounds<br>/All Compounds | Ames Positive<br>Rate |
|-------------------------------------------------------------------------------------|---------------------------------------|--------------------------------------|-----------------------|
| 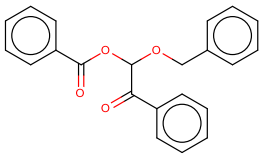   | [benzoyl(phenylmethoxy)amino]benzoate | 10/10                                | 1                     |
|    | 1,2-benzothiazole                     | 15/17                                | 0.88                  |
|    | Benzisothiazoles                      | 11/13                                | 0.85                  |
|  | Pyrene                                | 39/39                                | 1                     |
|  | Benzo[a]anthracene                    | 34/39                                | 0.87                  |
|  | Chrysene                              | 22/23                                | 0.96                  |
|  | 9H-fluorene                           | 40/50                                | 0.8                   |
|  | Benzofuran dioxetanes                 | 10/12                                | 0.83                  |

| Scaffold                                                                            | Name                  | Positive Compounds<br>/All Compounds | Ames Positive<br>Rate |
|-------------------------------------------------------------------------------------|-----------------------|--------------------------------------|-----------------------|
| 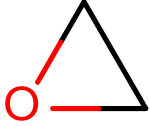   | Oxirane               | 36/51                                | 0.71                  |
|    | Phenazine             | 23/25                                | 0.92                  |
|    | Quinoxaline           | 14/18                                | 0.78                  |
|  | Naphthalene-1,4-dione | 8/10                                 | 0.8                   |
|  | (E)-stilbene          | 28/34                                | 0.82                  |

| Scaffold                                                                            | Name                                            | Positive Compounds<br>/All Compounds | Ames Positive<br>Rate |
|-------------------------------------------------------------------------------------|-------------------------------------------------|--------------------------------------|-----------------------|
| <b>Non-mutagenic Scaffolds</b>                                                      |                                                 |                                      |                       |
| 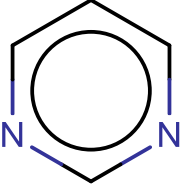   | Pyrimidine                                      | 4/15                                 | 0.27                  |
|    | p-Benzoquinone                                  | 3/14                                 | 0.21                  |
|  | <b>(39)</b><br>N-phenyl-quinoline-8-sulfonamide | 0/11                                 | 0                     |
|  | 1,3-benzodioxole                                | 2/14                                 | 0.14                  |
|  | Coumarin                                        | 1/10                                 | 0.1                   |

| Scaffold                                                                            | Name                          | Positive Compounds<br>/All Compounds | Ames Positive<br>Rate |
|-------------------------------------------------------------------------------------|-------------------------------|--------------------------------------|-----------------------|
| 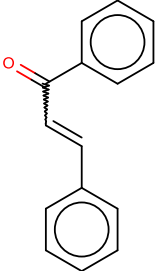   | Chalcone                      | 4/17                                 | 0.24                  |
|    | Cyclohexane                   | 3/26                                 | 0.12                  |
|   | Diphenylmethane               | 16/49                                | 0.33                  |
|  | <b>(40)</b><br>1,3,5-triazine | 0/11                                 | 0                     |
|  | Pyridine                      | 14/50                                | 0.28                  |

| Scaffold                                                                          | Name        | Positive Compounds<br>/All Compounds | Ames Positive<br>Rate |
|-----------------------------------------------------------------------------------|-------------|--------------------------------------|-----------------------|
| 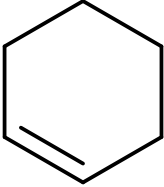 | Cyclohexene | 2/16                                 | 0.13                  |
|  | 1H-indole   | 8/26                                 | 0.31                  |

**Figure A.** The example of non-mutagenic compounds having the structural alert of “Polycyclic Aromatic Hydrocarbons”.

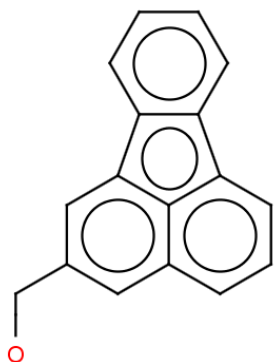

(34) fluoranthren-2-ylmethanol

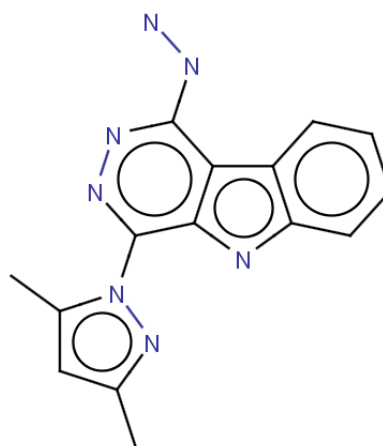

(35)

1-{1-hydrazinyl-3H-pyridazino[4,5-b]indol-4-yl}-3,5-dimethyl-1H-pyrazole

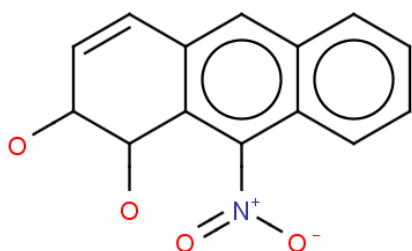

(36) 9-nitro-1,2-dihydroanthracene-1,2-diol

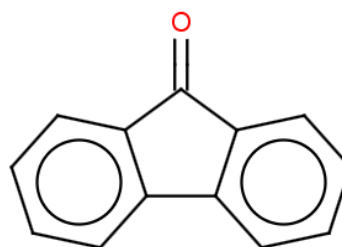

(37) 9H-fluoren-9-one

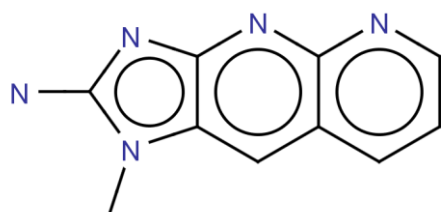

(38)

1-methyl-1H-imidazo[4,5-b]1,8-naphthyridin-2-amine

**Figure B.** The non-mutagenic compounds containing the non-mutagenic scaffolds of N-phenyl-quinoline-8-sulfonamide (**39**), and 1,3,5-triazine (**40**).

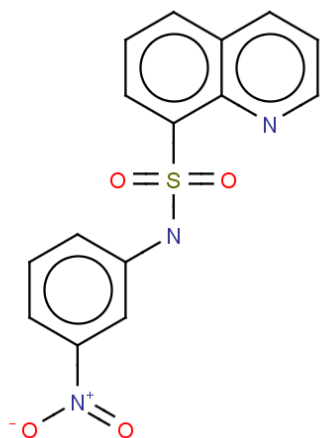

(41)

N-(3-nitrophenyl)quinoline-8-sulfonamide

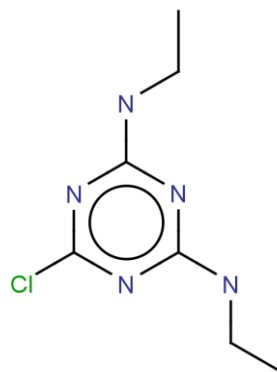

(42)

6-chloro-2-N,4-N-diethyl-1,3,5-triazine-2,4-diamine

**Figure C.** The major scaffolds contributing to Ames mutagenicity.

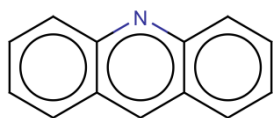

acridine  
(0.94/53)

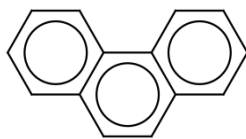

phenanthrene  
(0.93/40)

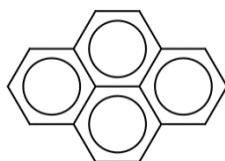

pyrene  
(1/39)

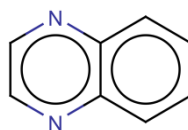

quinoxaline  
(0.78/18)



**Figure D.** Scaffolds having mutagenic tendencies.

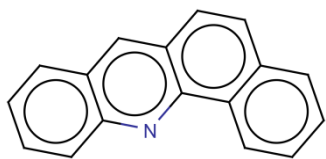

benzo[c]acridine

(0.86/21)

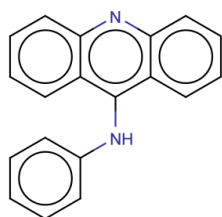

N-phenylacridin-9-amine

(0.94/18)

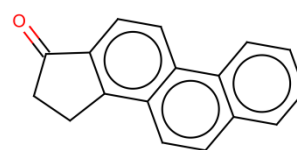

15,16-dihydrocyclopenta[a]phenanthren-17-one

(0.77/13)

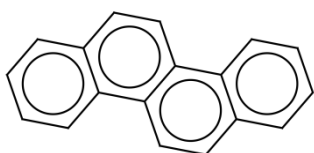

chrysene

(0.96/23)

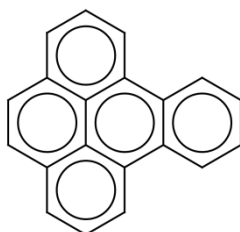

benzo[e]pyrene

(0.9/10)

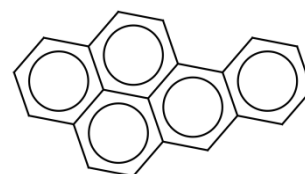

benzo[a]pyrene

(0.84/50)

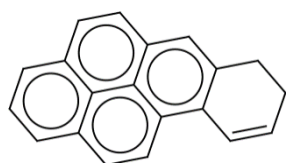

9,10-dihydro-benzo[a]pyrene

(0.9/10)

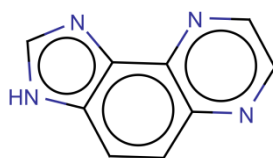

1H-imidazo[4,5-g]  
quinoxaline

(0.86/22)

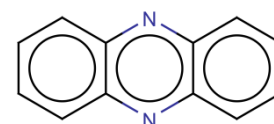

phenazine

(0.92/25)
